# Supplementary material for: Reverse transcriptase genes are highly abundant and transcriptionally active in marine plankton assemblages
Source: PubMed Central journal article supplement — ISME J. 2015 Nov 27;10(5):1134–46. doi: 10.1038/ismej.2015.192 (PMC5029228; doi:10.1038/ismej.2015.192), 2015-11-27
Supplement: ismej2015192x2.pdf [file ismej2015192x2.pdf]

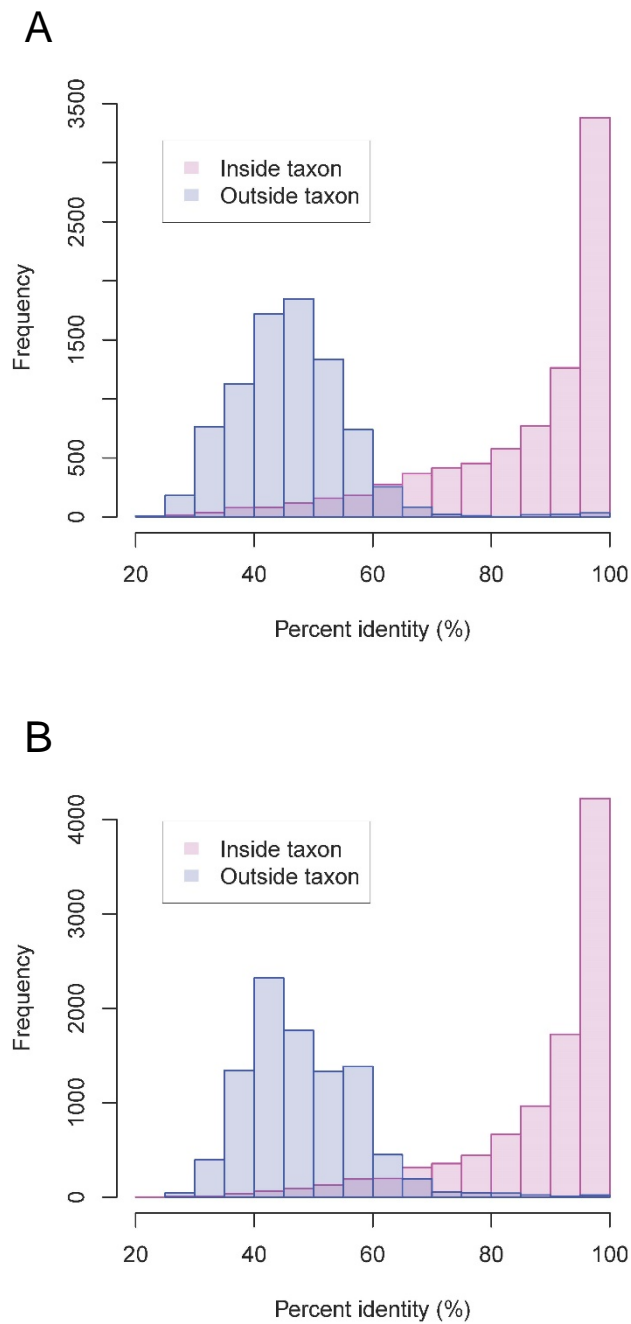

**Figure S1. Distribution of pair-wise amino acid sequence identities of known RT domains.** When two sequences have the same taxonomic annotation at the second level of the hierarchy of the NCBI taxonomic classification, their comparison was classified as an “inside taxon” comparison. Other comparisons were classified as “outside taxon”. (A) Taxonomically characterized Copia RTs. (B) Taxonomically characterized Gypsy RTs.
