# Supplementary material for: Reverse transcriptase genes are highly abundant and transcriptionally active in marine plankton assemblages
Source: PubMed Central journal article supplement — ISME J. 2015 Nov 27;10(5):1134–46. doi: 10.1038/ismej.2015.192 (PMC5029228; doi:10.1038/ismej.2015.192), 2015-11-27
Supplement: ismej2015192x4.pdf [file ismej2015192x4.pdf]

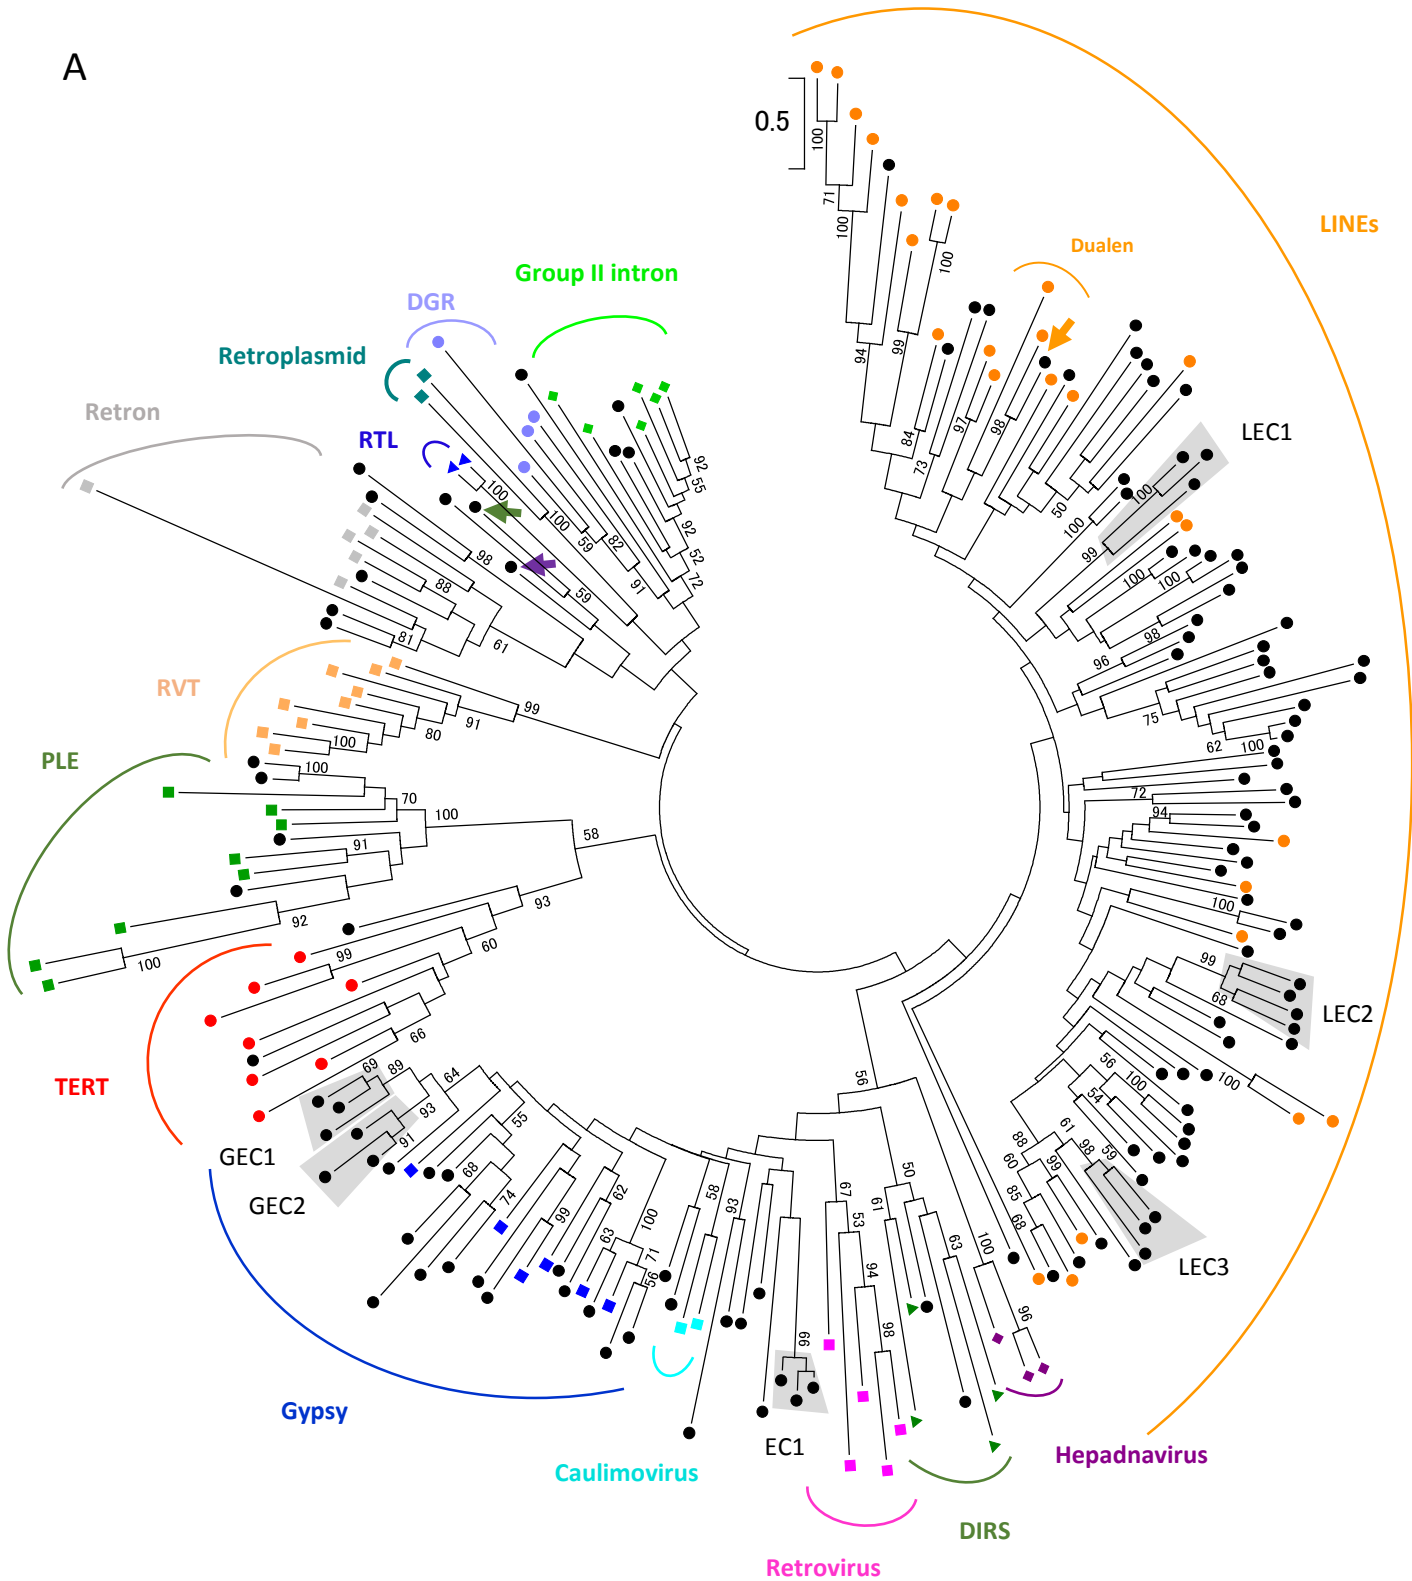

**Figure S3. ML-trees of known and environmental RT sequences.** (A) ML-tree of known RT sequences with 124 RT-like sequences identified in the metagenomic data.

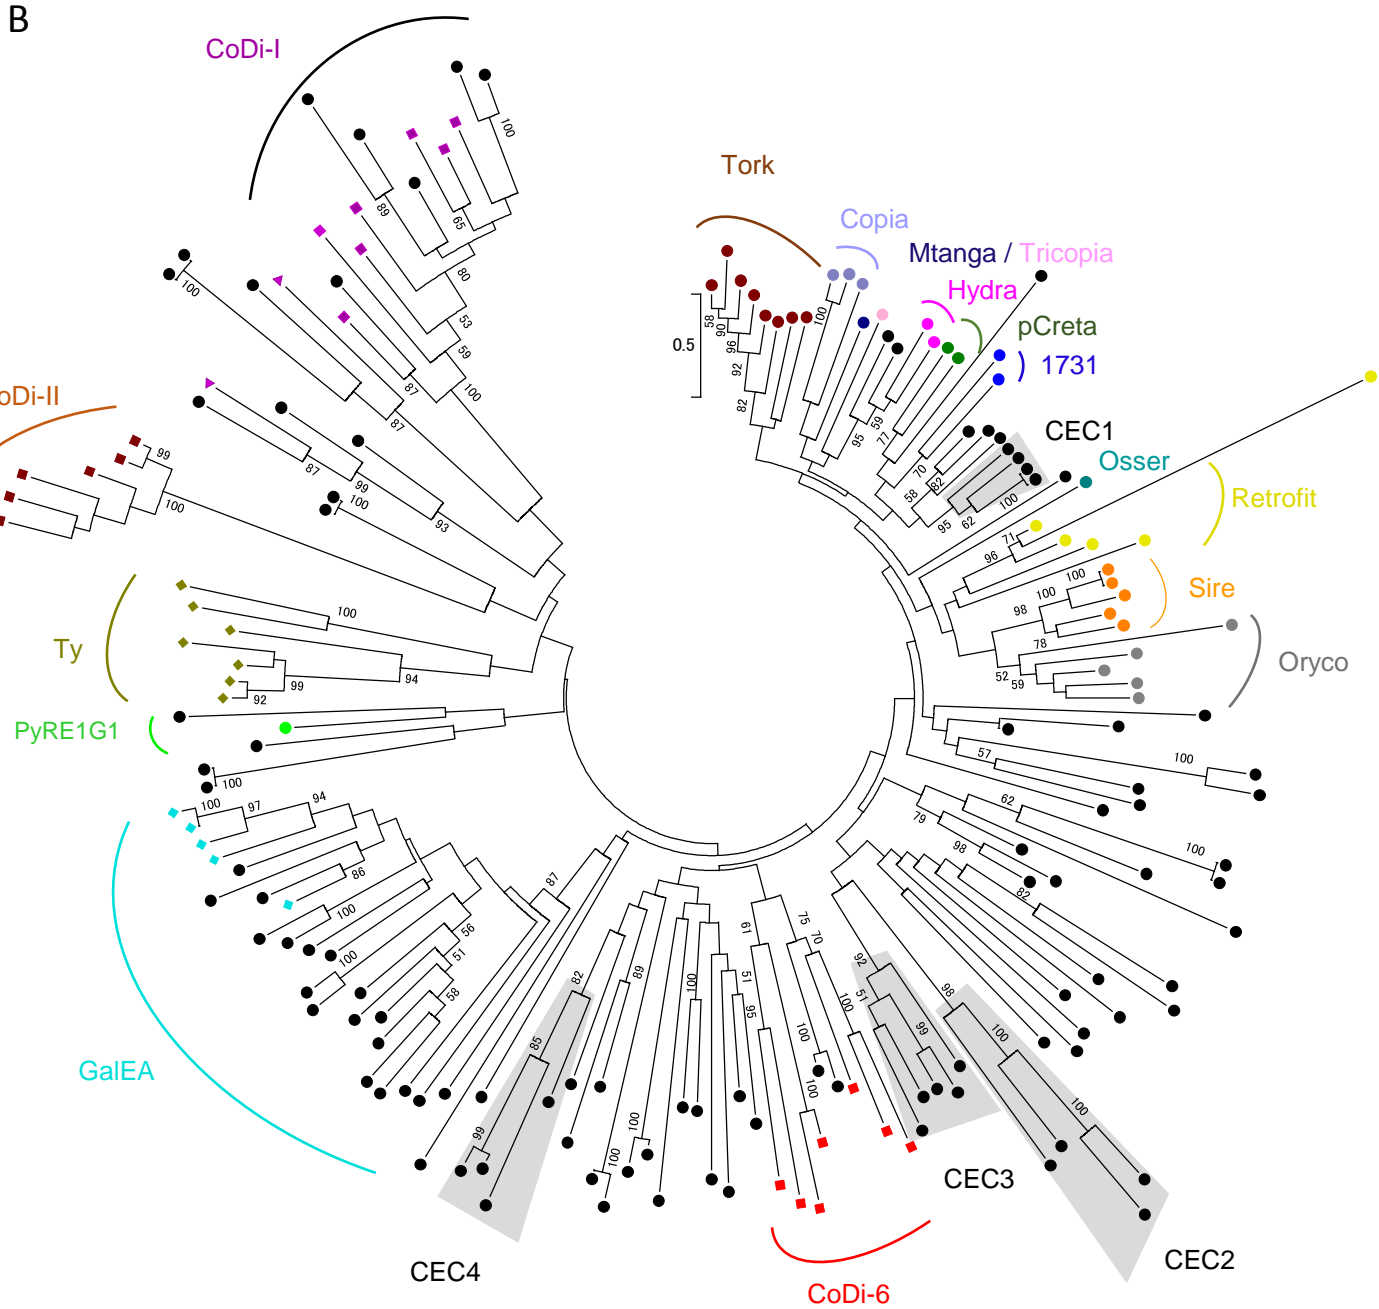

**Figure S3. ML-trees of known and environmental RT sequences.** (B) ML-tree of known RT sequences with 100 Copia RT-like sequences identified in the metagenomic data.

C

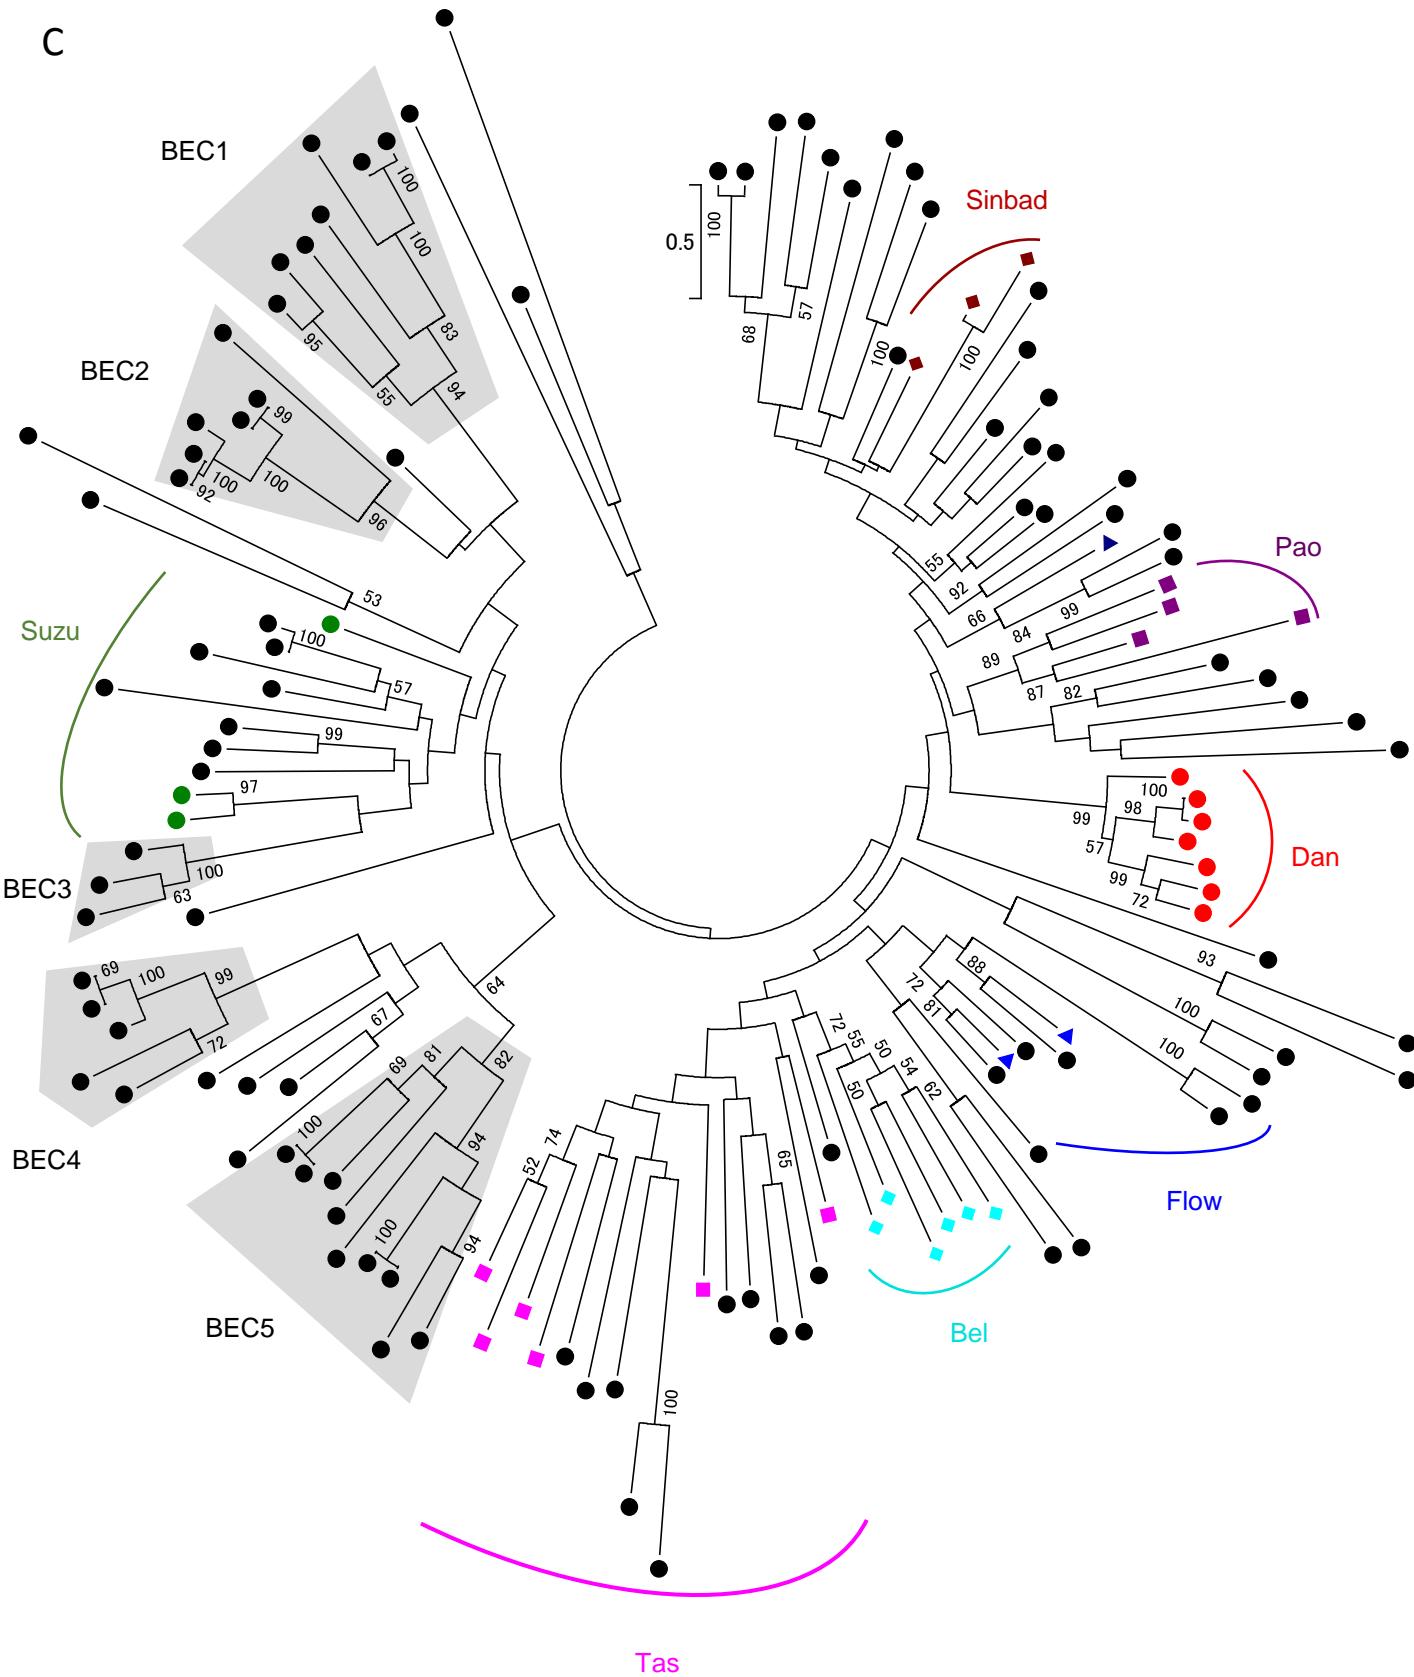

**Figure S3. ML-trees of known and environmental RT sequences.** (C) ML-tree of known RT sequences with 100 longest BEL RT-like sequences identified in the metagenomic data.
