# Supplementary material for: Reverse transcriptase genes are highly abundant and transcriptionally active in marine plankton assemblages
Source: PubMed Central journal article supplement — ISME J. 2015 Nov 27;10(5):1134–46. doi: 10.1038/ismej.2015.192 (PMC5029228; doi:10.1038/ismej.2015.192), 2015-11-27
Supplement: ismej2015192x5.pdf [file ismej2015192x5.pdf]

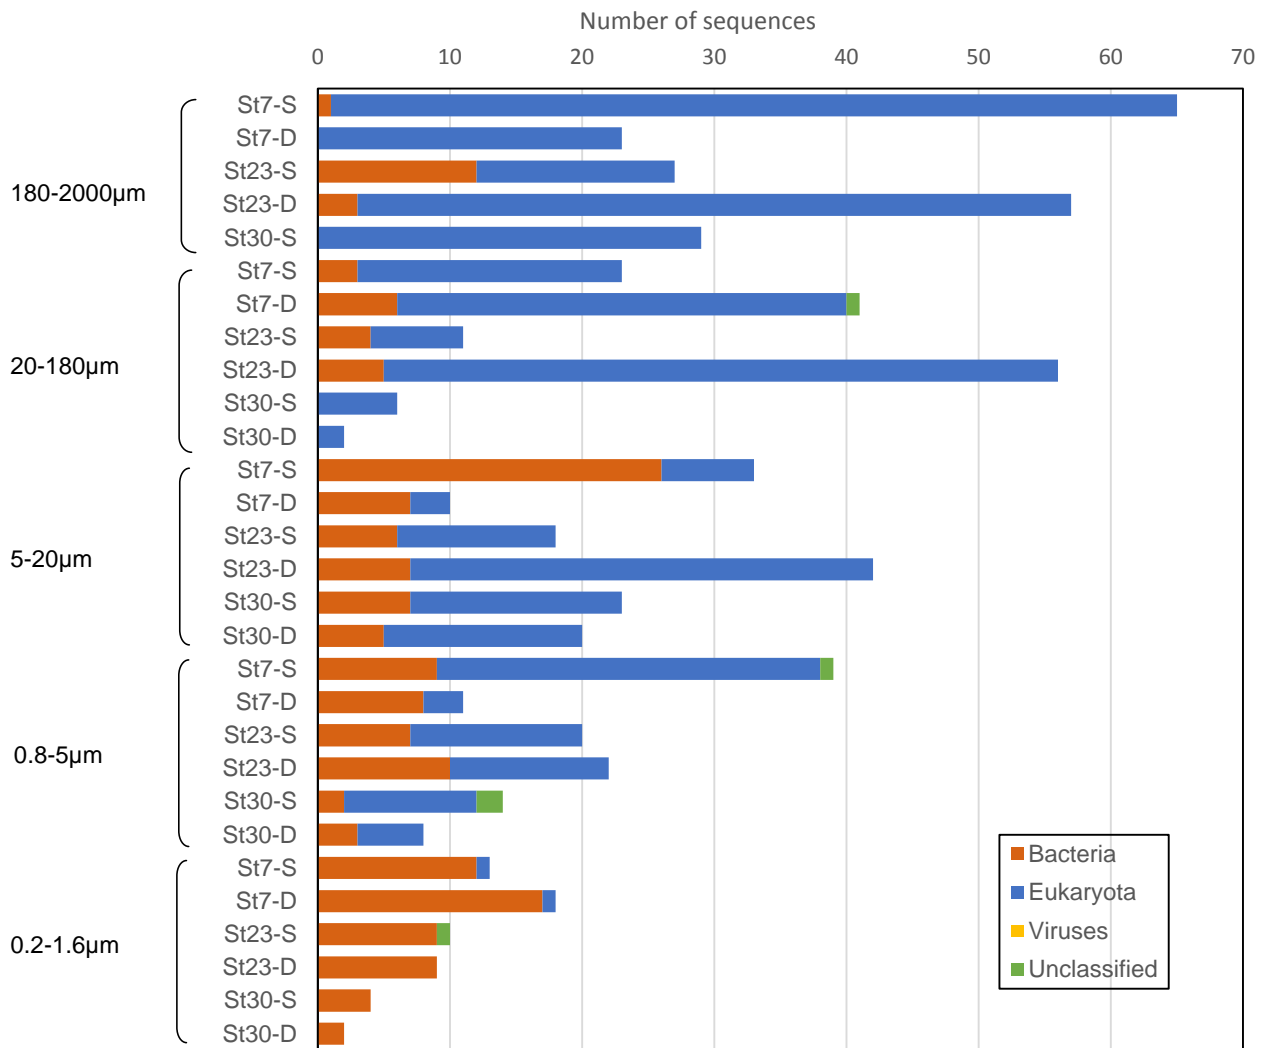

**Figure S4. Number of identified RT-like metagenomic sequences and their taxonomic classification.** The stringent taxonomy annotation method allowed us to classify 656 metagenomic sequences.
