# Supplementary material for: Reverse transcriptase genes are highly abundant and transcriptionally active in marine plankton assemblages
Source: PubMed Central journal article supplement — ISME J. 2015 Nov 27;10(5):1134–46. doi: 10.1038/ismej.2015.192 (PMC5029228; doi:10.1038/ismej.2015.192), 2015-11-27
Supplement: ismej2015192x6.pdf [file ismej2015192x6.pdf]

Nb of sequences

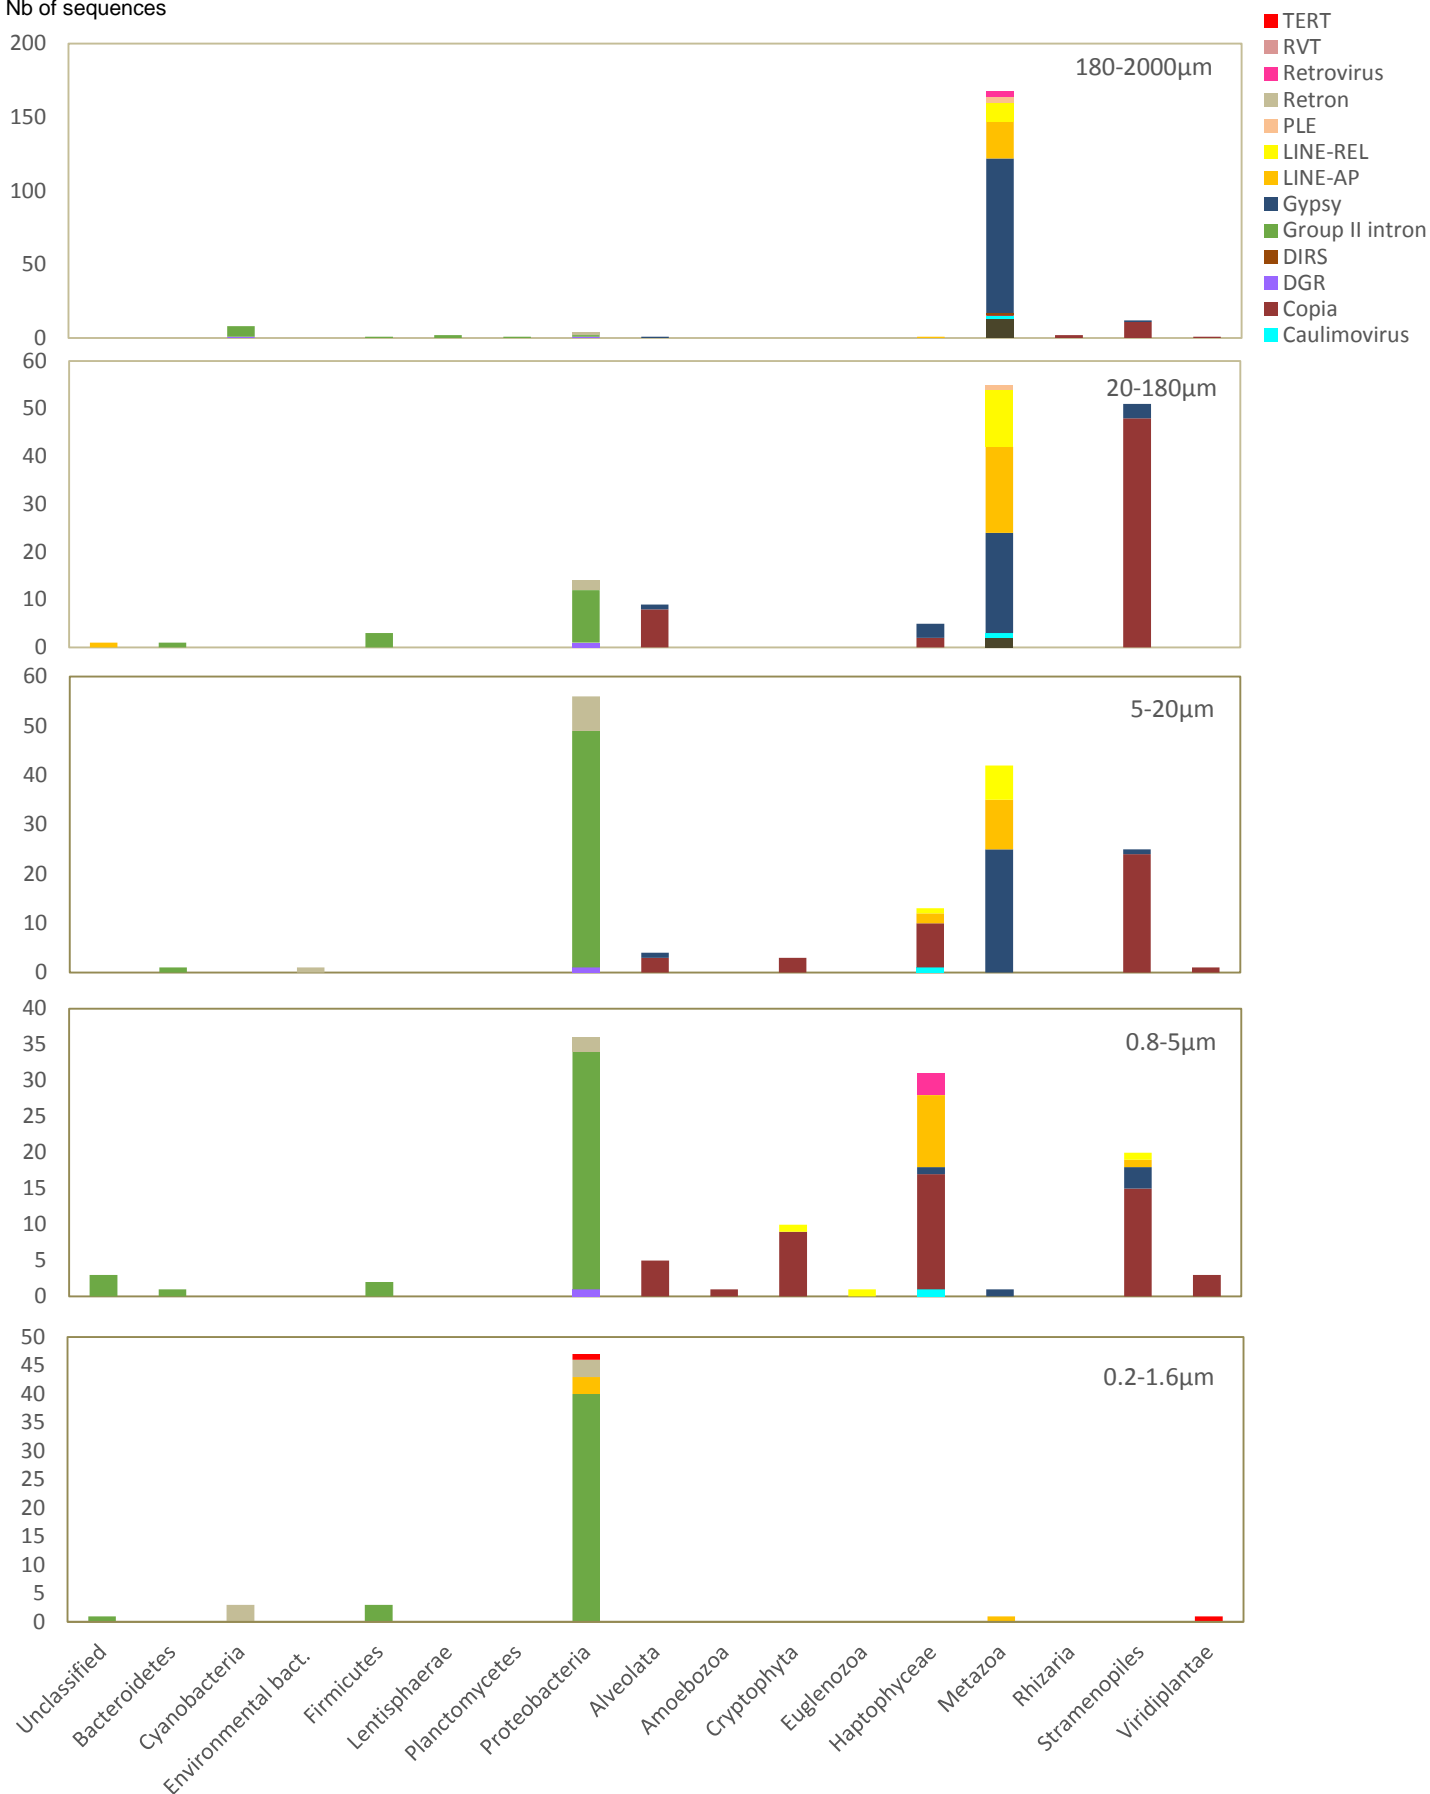

**Figure S5. Number of RT-like metagenomic sequences and their taxonomic classification and RT classification.**
