# Supplementary material for: Reverse transcriptase genes are highly abundant and transcriptionally active in marine plankton assemblages
Source: PubMed Central journal article supplement — ISME J. 2015 Nov 27;10(5):1134–46. doi: 10.1038/ismej.2015.192 (PMC5029228; doi:10.1038/ismej.2015.192), 2015-11-27
Supplement: ismej2015192x7.pdf [file ismej2015192x7.pdf]

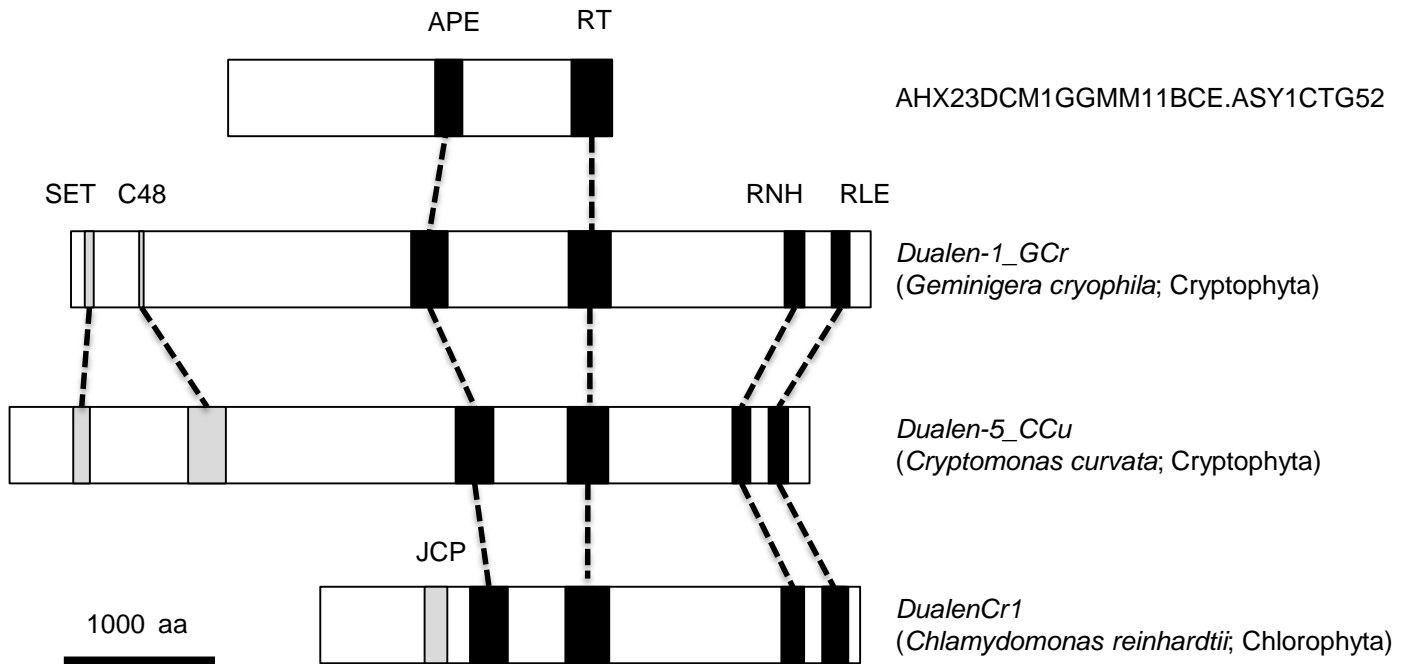

**Figure S6. The longest ORF represents a group of Dualen non-LTR retrotransposons distributed among cryptophytes.** APE: apurinic-like endonuclease; RT: reverse transcriptase; RNH: ribonuclease H; RLE: restriction-like endonuclease; SET: SET methyltransferase; C48: C48/Ulp1 peptidase; JCP: Josephin-like cysteine protease.
