# Supplementary material for: Reverse transcriptase genes are highly abundant and transcriptionally active in marine plankton assemblages
Source: PubMed Central journal article supplement — ISME J. 2015 Nov 27;10(5):1134–46. doi: 10.1038/ismej.2015.192 (PMC5029228; doi:10.1038/ismej.2015.192), 2015-11-27
Supplement: ismej2015192x9.pdf [file ismej2015192x9.pdf]

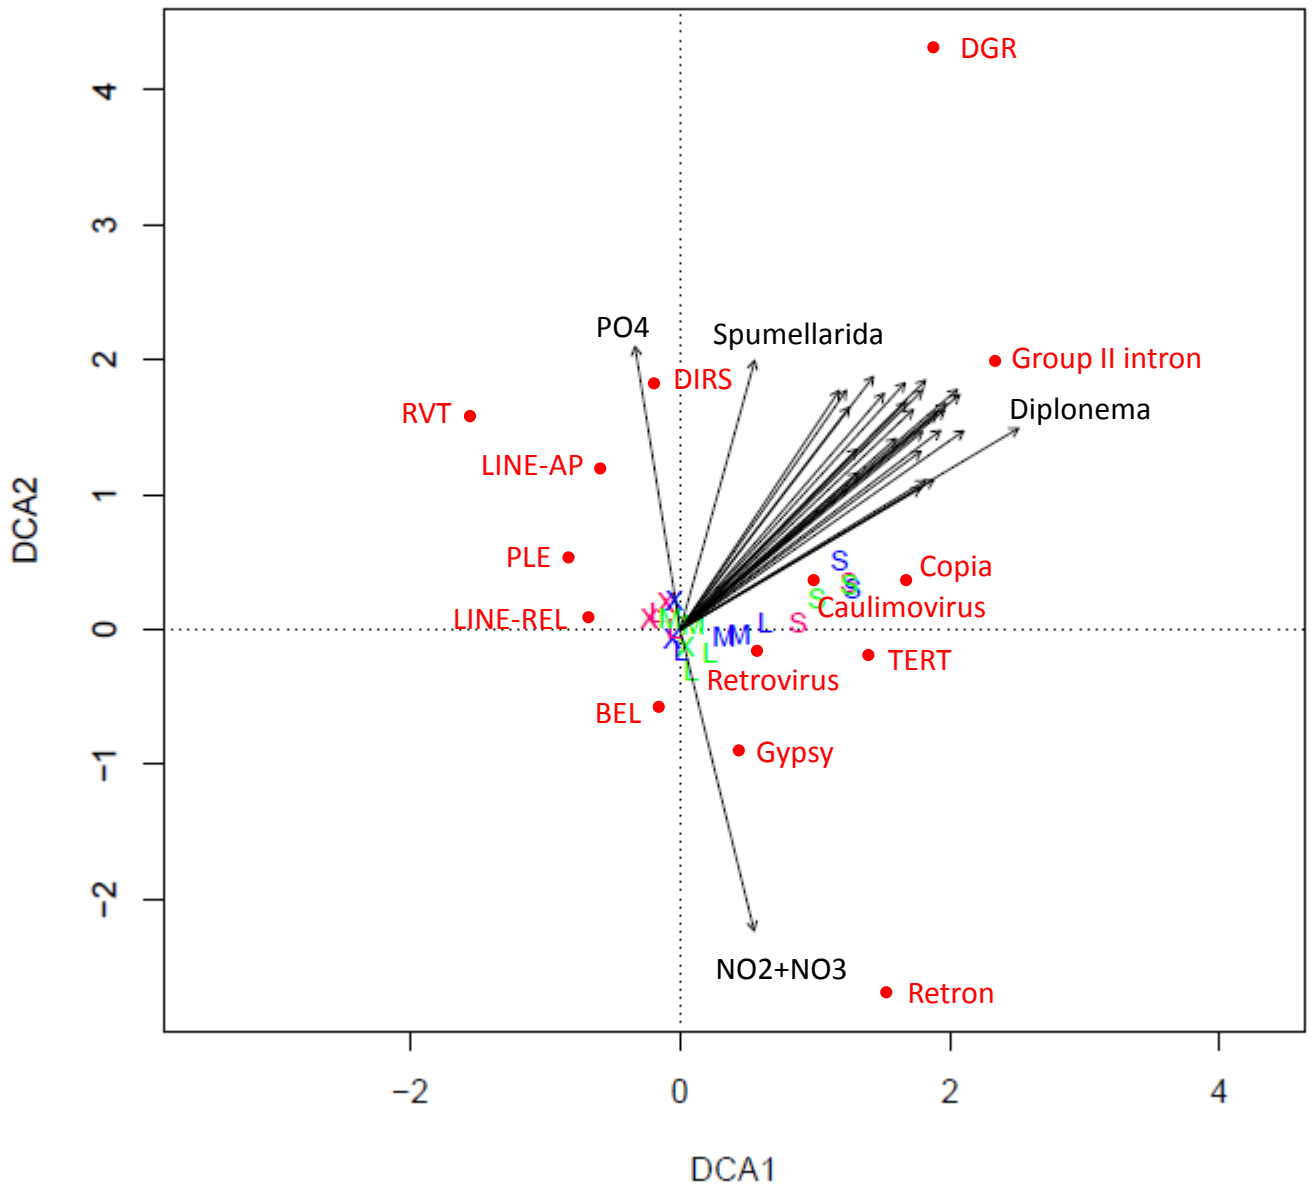

**Figure S8. Detrended Correspondence Analysis (DCA) ordinations of 21 samples for metagenomic RT gene abundance.** DCA ordinations are shown with significant ( $p \leq 0.05$ ) environmental vectors fitted using envfit. Arrows indicate the direction of the (increasing) environmental gradient, and their lengths are proportional to their correlations with the ordination. X stands for size fraction samples of 180-2000  $\mu\text{m}$ , L for 20-180  $\mu\text{m}$ , M for 5-20  $\mu\text{m}$  and S for 0.8-5  $\mu\text{m}$ . Samples from St TARA\_007 is coloured in pink, St TARA\_023 in blue, and St TARA\_030 in green.
